# Supplementary material
Source: PubMed Central journal article supplement (PMC9529191)
Supplement: ASN.2021111425SupplementaryData1.pdf [file ASN.2021111425SupplementaryData1.pdf]

## **Supplemental material Table of Contents**

**Supplemental Figure 1.** Genetic analysis reveals homozygous mutation of *PKDI* in WT 9-12 cells.

**Supplemental Figure 2.** Downregulation of CDYL is accompanied by upregulation of histone Kcr in early-onset and late-onset ADPKD mouse model.

**Supplemental Figure 3.** Body weight of WT and ADPKD mice in the indicated groups.

**Supplemental Figure 4.** Upregulation of H3K18cr in early-onset and late-onset ADPKD mouse model.

**Supplemental Figure 5.** Intrinsic disorder of CDYL.

**Supplemental Figure 6.** CDYL WT and KR>A mutant fusion proteins.

**Supplemental Figure 7.** *Cdyl* mRNA in ADPKD mice.

**Supplemental Table 1.** Primers for RT-PCR.

**Supplemental Table 2.** Characteristics of ADPKD patients.

**Supplemental Table 3.** Characteristics of ADPKD mice.

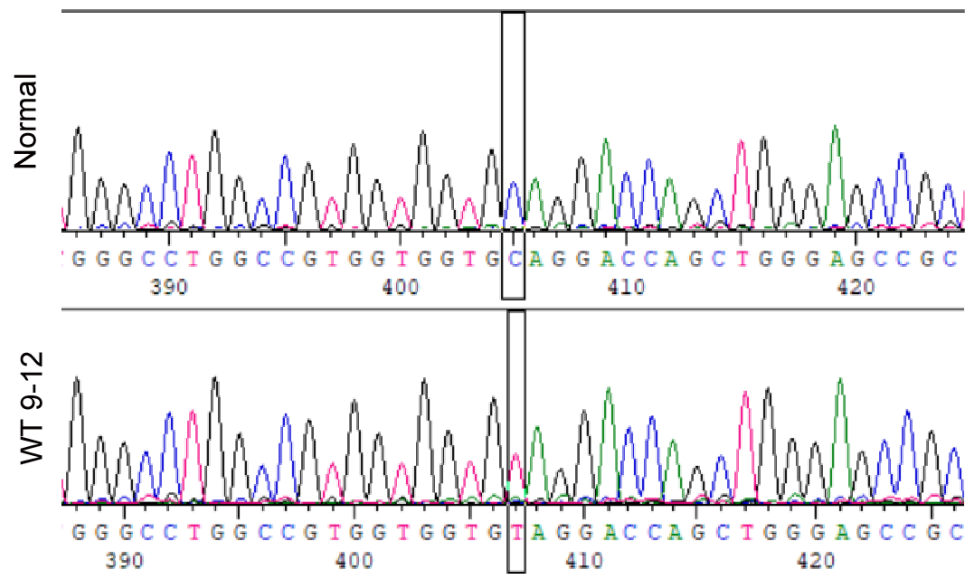

**Supplemental Figure 1.** Genetic analysis reveals homozygous mutation of *PKD1* in WT 9-12 cells.

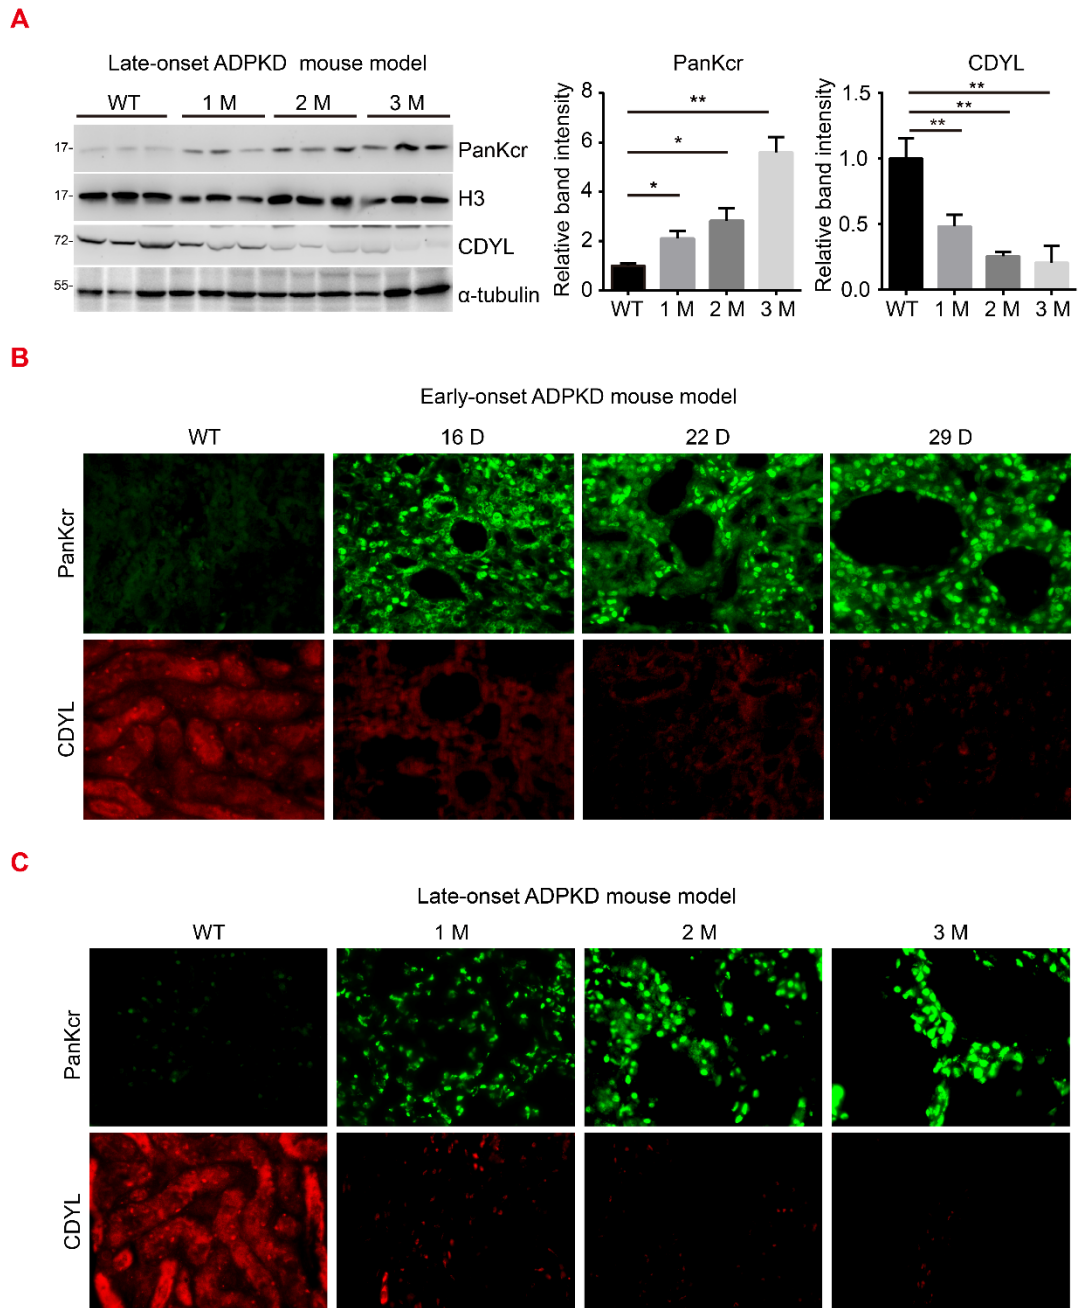

**Supplemental Figure 2.** Downregulation of CDYL is accompanied by upregulation of histone Kcr in early-onset and late-onset ADPKD mouse model. (A) Western blotting analysis of CDYL and PanKcr in kidneys from WT and late-onset ADPKD mouse model at the indicated times. Data were analyzed by two-tailed unpaired Student's *t*-test and are represented as means  $\pm$  SEM. \* $P < 0.001$ , \*\* $P < 0.0001$ . (B and C) Immunofluorescence imaging of PanKcr and CDYL in mouse kidneys from early-onset (B) or late-onset (C) ADPKD mouse model at the indicated times.

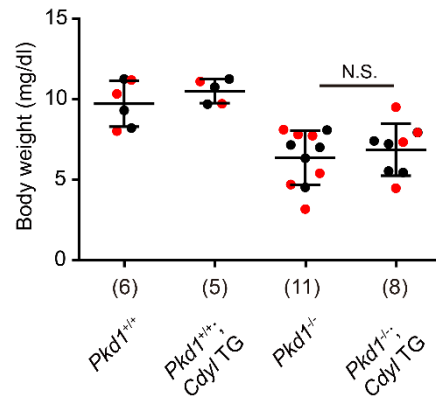

**Supplemental Figure 3.** Body weight of WT and ADPKD mice in the indicated groups. Red dots represented males and black dots represented females. N.S.: not significant.

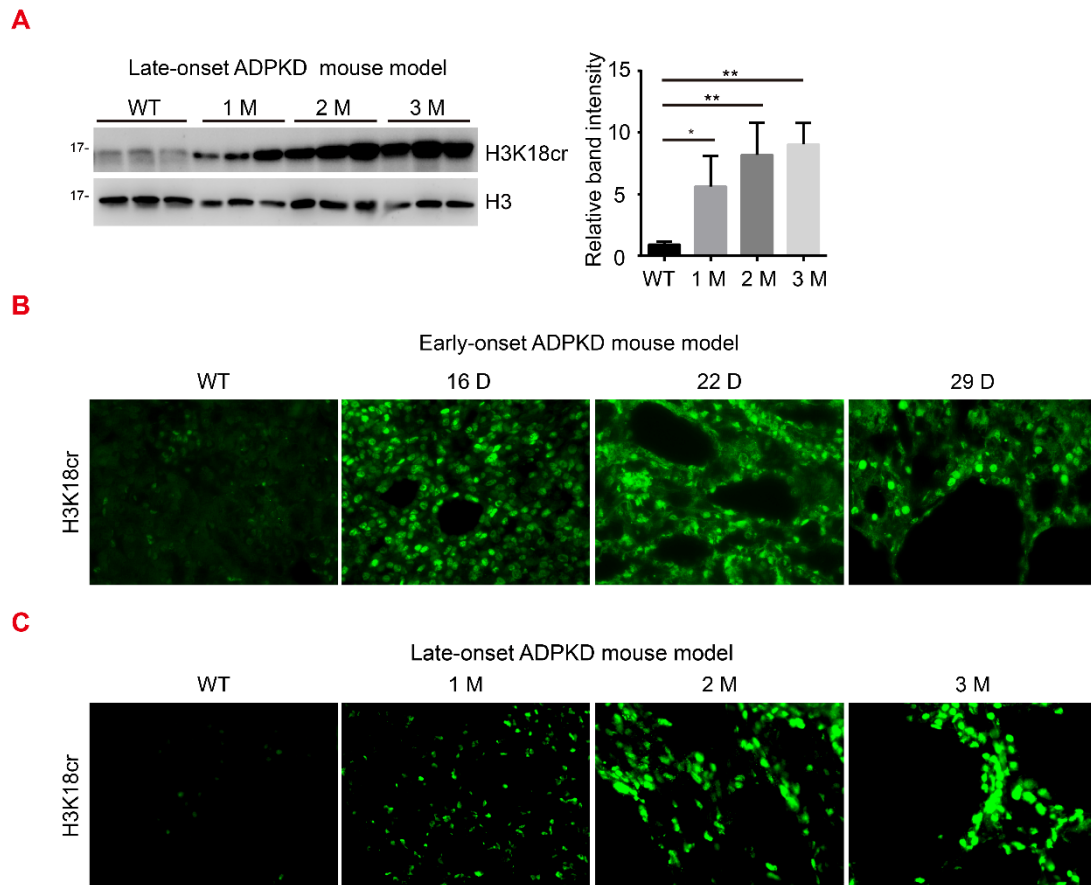

**Supplemental Figure 4.** Upregulation of H3K18cr in early-onset and late-onset ADPKD mouse model. (A) Western blotting analysis of H3K18cr in kidneys from WT and late-onset ADPKD mouse model at the indicated times. Data were analyzed by two-tailed unpaired Student's *t*-test and are represented as means  $\pm$  SEM. \* $P < 0.001$ , \*\* $P < 0.0001$ . (B and C) Immunofluorescence imaging of H3K18cr in mouse kidneys from early-onset (B) or late-onset (C) ADPKD mouse model at the indicated times.

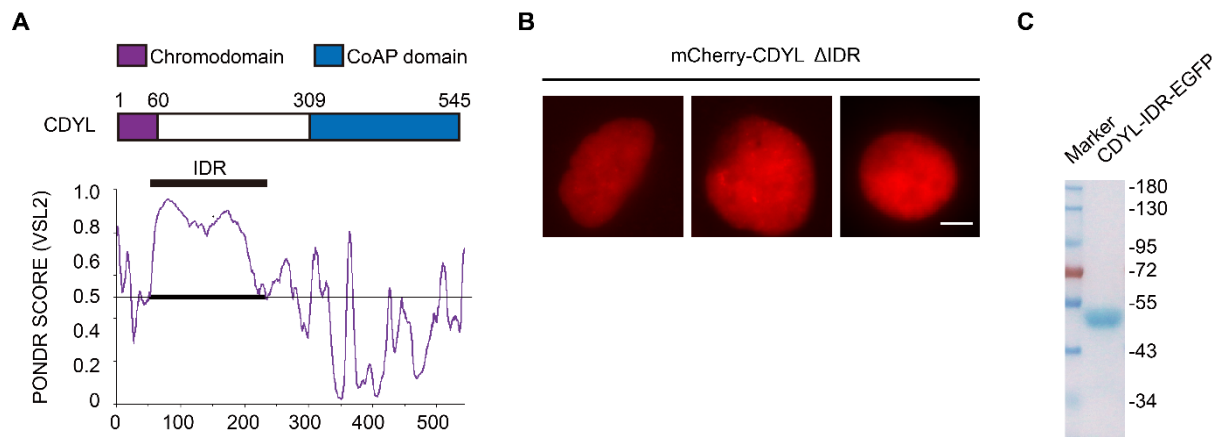

**Supplemental Figure 5.** Intrinsic disorder of CDYL. (A) For PONDOR prediction, a VSL2 score above 0.5 reflects a high degree of disorder. The black bar designates the IDR under investigation. (B) Immunofluorescence imaging of mCherry-CDYL  $\Delta$ IDR in WT 9-12 cells. Scale bar, 5  $\mu$ m. (C) Purified CDYL-IDR-EGFP fusion proteins stained with Coomassie Brilliant Blue.

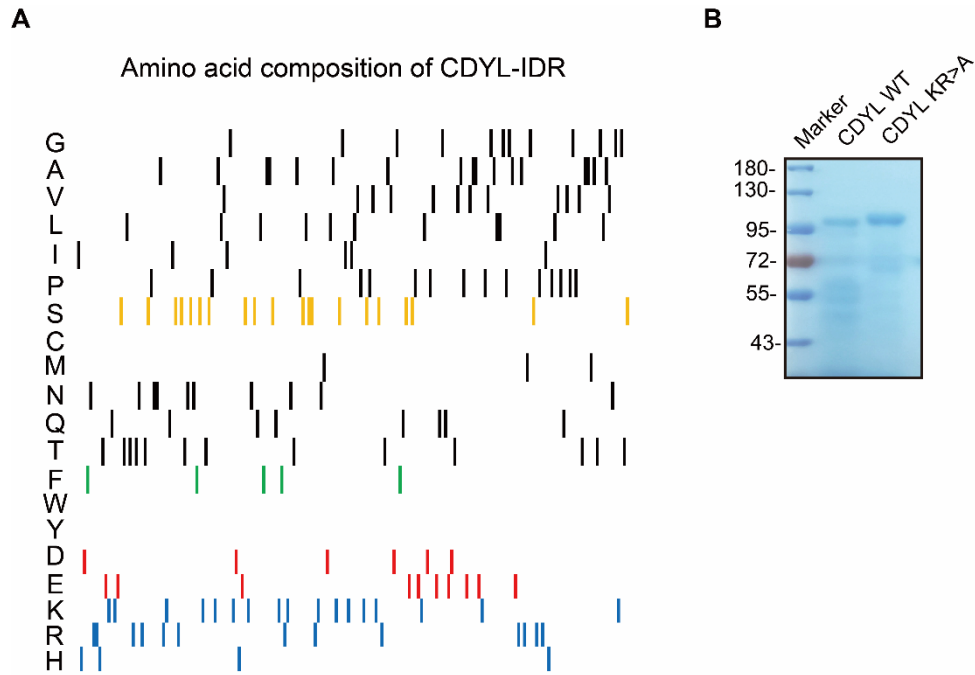

**Supplemental Figure 6.** CDYL WT and KR>A mutant fusion proteins. **(A)** Amino acid composition of the CDYL-IDR protein. Each row represents a single amino acid. Black bars represent the occurrence of the indicated amino acid at that position in CDYL-IDR. **(B)** Purified CDYL WT and KR>A mutant fusion proteins stained with Coomassie Brilliant Blue.

**A**

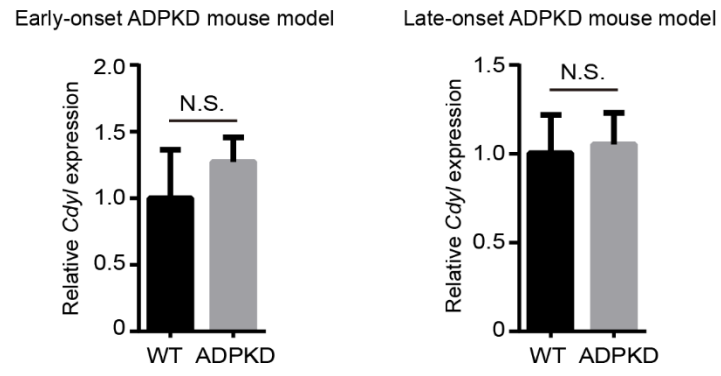

**Supplemental Figure 7.** *Cdy1* mRNA in ADPKD mice. N.S.: not significant.



**Supplemental Table 1. Primers for RT-PCR**

| Gene name           | Forward                | Reverse               |
|---------------------|------------------------|-----------------------|
| Mus. <i>Stat5a</i>  | CACTCCTGTACTTGGTTCGTCA | CCAGGTCAAACCTCGCCATCT |
| Mus. <i>Col5a1</i>  | GACTTCCCAGATGGCGAATA   | CCAAGAAGTGATTCTGGCTCC |
| Mus. <i>Tlr4</i>    | TCCCTGCATAGAGGTAGTTCC  | TCAAGGGGTTGAAGCTCAGA  |
| Mus. <i>Igf2</i>    | CGGCTTCTACTTCAGCAGGC   | TATCTGGGGAAGTCGTCCG   |
| Mus. <i>Actin</i>   | TTGCTGACAGGATGCAGAAG   | ATCCACATCTGCTGGAAGGT  |
| Homo. <i>STAT5A</i> | GAAGATCAAGCTGGGGCACT   | CGGACCAGCCTCTGTTCATT  |
| Homo. <i>COL5A1</i> | CTTCCCTGACAAGAAGTCCGAA | CCACATAGGAGAGCAGTTTCC |
| Homo. <i>TLR4</i>   | CTGCGTGGAGGTGGTTCC     | AGCTCAGGTCCAGGTTCTTG  |
| Homo. <i>SEMA5A</i> | GAACCTGCCACCCACC       | TCTCACACACCAACACAGGT  |
| Homo. <i>GAPDH</i>  | TTGCCCTCAACGACCACTTT   | TGGTCCAGGGGTCTTACTCC  |

**Supplemental Table 2. Characteristics of ADPKD patients**

| Age (yr) | sex    | Family history | Hepatic cyst | AST (U/L) | ALT (U/L) | eGFR (mL/min/1.73m <sup>2</sup> ) | BUN (mg/dL) | SCr (mg/dL) | CKD stages |
|----------|--------|----------------|--------------|-----------|-----------|-----------------------------------|-------------|-------------|------------|
| 49       | Male   | Y              | Y            | -         | -         | 52                                | 9.9         | 137.7       | III        |
| 55       | Female | Y              | Y            | 22        | 18        | 107                               | 7.4         | 47.4        | I          |
| 21       | Male   | Y              | N            | 14        | 9         | 96                                | 5.5         | 96.94       | I          |
| 63       | Female | Y              | N            | 21        | 12        | 35                                | 14          | 138.8       | III        |
| 35       | Male   | Y              | N            | 21        | 26        | 94                                | 6.4         | 92.66       | I          |
| 47       | Female | N              | N            | 13        | 10        | 48                                | 6.1         | 116.28      | III        |
| 60       | Male   | N              | N            | 16        | 20        | 80                                | 4.6         | 89.3        | II         |
| 71       | Male   | N              | Y            | 27        | 29        | 71                                | 7.2         | 92.81       | II         |
| 59       | Female | N              | N            | 18        | 15        | 57                                | 11.7        | 94.09       | III        |
| 45       | Male   | N              | N            | 19        | 12        | 64                                | 9.5         | 118         | II         |
| 55       | Female | N              | Y            | 30        | 31        | 46                                | 7.3         | 126.31      | III        |
| 51       | Female | N              | Y            | 19        | 12        | 77                                | 6.6         | 77.3        | II         |
| 52       | Male   | N              | N            | 33        | 66        | 65                                | 9.8         | 111.2       | II         |
| 32       | Female | Y              | Y            | 16        | 8         | 116                               | 5.1         | 60.5        | I          |
| 72       | Male   | N              | N            | 22        | 15        | 68                                | 7.5         | 96.6        | II         |
| 23       | Male   | N              | N            | 29        | 69        | 131                               | 5.9         | 70.1        | I          |
| 52       | Male   | N              | N            | 24        | 25        | 60                                | 7.2         | 118.45      | II         |
| 45       | Female | N              | Y            | 19        | 9         | 86                                | 6.5         | 73          | II         |
| 61       | Male   | N              | Y            | 24        | 17        | 49                                | 10.7        | 132.2       | III        |
| 42       | Male   | Y              | Y            | 17        | 17        | 76                                | 5.1         | 104         | II         |
| 49       | Male   | N              | Y            | 21        | 32        | 132                               | 8           | 63.3        | I          |
| 65       | Male   | N              | N            | 21        | 11        | 84                                | 5.2         | 83.6        | II         |
| 49       | Female | Y              | Y            | 13        | 5         | 13                                | 23.1        | 344.7       | V          |
| 48       | Male   | Y              | Y            | 23        | 24        | 63                                | 7.6         | 117.3       | II         |
| 51       | Female | Y              | Y            | 17        | 12        | 26                                | 11          | 206.8       | IV         |

Y: yes, N: no.

**Supplemental Table 3. Characteristics of ADPKD mice**

| Phenotype                          | sex                                | Body weight (g) | Kidney weight (g) | KW/BW (%) | cystic index (%) | BUN (mg/dL) | SCr (mg/dL) |
|------------------------------------|------------------------------------|-----------------|-------------------|-----------|------------------|-------------|-------------|
| <i>Pkd1<sup>+/+</sup></i>          | Female                             | 9.31            | 0.125             | 1.34      |                  | 17.25       | 0.16        |
|                                    | Female                             | 8.21            | 0.124             | 1.51      |                  | 19.72       | 0.16        |
|                                    | Male                               | 8.02            | 0.117             | 1.46      |                  | 22.90       | 0.33        |
|                                    | Male                               | 10.33           | 0.1398            | 1.35      |                  | 17.13       | 0.66        |
|                                    | Female                             | 11.26           | 0.166             | 1.47      |                  | 17.92       | 0.33        |
|                                    | Male                               | 11.19           | 0.1538            | 1.37      |                  | 19.34       | 0.33        |
| <i>Pkd1<sup>+/+</sup>; Cdy1 TG</i> | Male                               | 9.72            | 0.124             | 1.28      |                  | 19.18       | 0.33        |
|                                    | Male                               | 11.1            | 0.1422            | 1.28      |                  | 18.88       | 0.16        |
|                                    | Female                             | 10.75           | 0.166             | 1.54      |                  | 23.53       | 0.33        |
|                                    | Female                             | 11.26           | 0.114             | 1.01      |                  | 21.48       | 0.16        |
|                                    | Female                             | 9.7             | 0.1555            | 1.60      |                  | 21.82       | 0.49        |
| <i>Pkd1<sup>-/-</sup></i>          | Female                             | 4.52            | 0.412             | 9.12      | 36.91            | 53.55       | 1.81        |
|                                    | Male                               | 4.7             | 0.303             | 6.45      | 43.69            | 56.28       | 1.97        |
|                                    | Male                               | 8.1             | 0.7584            | 9.36      | 64.43            | 67.20       | 0.99        |
|                                    | Female                             | 8.08            | 0.63              | 7.80      | 48.87            | 61.38       | 1.97        |
|                                    | Female                             | 6.33            | 0.63              | 9.95      | 48.81            | 53.93       | 2.30        |
|                                    | Female                             | 7.16            | 0.678             | 9.47      | 55.82            | 73.95       | 1.48        |
|                                    | Male                               | 7.8             | 0.6558            | 8.41      | 32.17            | 62.35       | 0.82        |
|                                    | Male                               | 5.39            | 0.499             | 9.26      | 44.57            | 76.45       | 1.15        |
|                                    | <i>Pkd1<sup>-/-</sup>; Cdy1 TG</i> | Male            | 7.93              | 0.54      | 6.81             | 37.76       | 57.74       |
| Female                             |                                    | 5.45            | 0.311             | 5.71      | 32.58            | 50.87       | 0.82        |
| Female                             |                                    | 5.53            | 0.36              | 6.51      | 16.05            | 44.97       | 0.49        |
| Male                               |                                    | 9.51            | 0.3703            | 3.89      | 23.96            | 40.32       | 0.33        |
| Male                               |                                    | 7.73            | 0.5001            | 6.47      | 41.86            | 60.38       | 2.14        |
| Female                             |                                    | 7.01            | 0.7023            | 10.02     | 47.59            | 56.95       | 1.32        |
| Female                             |                                    | 7.22            | 0.5504            | 7.62      | 27.92            | 48.15       | 0.33        |
| Male                               |                                    | 4.465           | 0.1628            | 3.65      | 23.84            | 52.85       | 0.16        |
| Male                               |                                    | 3.165           | 0.2291            | 7.24      | 35.80            | 78.80       | 2.47        |
| Female                             |                                    | 7.41            | 0.2196            | 2.96      | 30.76            | 21.15       | 0.49        |
| Male                               |                                    | 7.33            | 0.2307            | 3.15      | 32.31            | 36.08       | 0.66        |
